# Supplementary material
Source: PubMed Central journal article supplement (PMC2854577)
Supplement: NIHMS187020-supplement-1_si_001.pdf [file NIHMS187020-supplement-1_si_001.pdf]

# Supporting Information

## A Simple and Highly Sensitive Colorimetric Detection Method for Gaseous Formaldehyde

Liang Feng<sup>†‡</sup>, Christopher J. Musto<sup>†</sup>, Kenneth S. Suslick<sup>†\*</sup>

<sup>†</sup> Department of Chemistry, University of Illinois at Urbana-Champaign, 600 S. Mathews Ave., Urbana, Illinois 61801 USA

<sup>‡</sup> Dalian Institute of Chemical Physics, Chinese Academy of Sciences, 457 Zhongshan Road, Dalian 116023, P.R. China

### Experimental:

All reagents used were analytical-reagent grade, obtained from Sigma-Aldrich, and used without further purification unless otherwise specified. A certified, premixed formaldehyde gas tank was obtained from Matheson Tri-Gas Corp. through S. J. Smith, Co. (Urbana, IL). Polyvinylidene difluoride (PVDF, [CH<sub>2</sub>CF<sub>2</sub>]<sub>n</sub>) membrane (thickness: 165 μm; pore size: 0.45 μm) was obtained from VWR Scientific. (Batavia, IL).

For printing of the sensor arrays, we prepared polymer-colorant solutions in 2-methoxyethanol using commercially available poly(ethyleneglycol) bis(3-amino-propyl)-terminated (MW 1500), butyl benzyl phthalate, and poly(ethyleneglycol) (MW 400) with a variety of chemically responsive indicators (Supporting Information Table S1). The solutions were loaded into a multihole Teflon ink well. Sensor arrays were printed by a robotic printer (Nanoprint Microarray Printer, ArrayIt Co., Mountain View, CA) using an array of 30 or 36 floating slotted pins (which delivered approximately 130 nL each) by dipping into the ink well and transferring to a hydrophobic PVDF membranes. Once printed, the arrays were vacuum dried for 24 hours and aged in a sealed bag under nitrogen for at least 2 days before sensing experiments were performed.

Gas streams containing formaldehyde at lower concentrations were prepared by mixing the prediluted formaldehyde gas from the premixed tank with dry and wet nitrogen gas. Importantly, in all cases, gas stream concentrations and relative humidity were confirmed by in-line analysis using an FTIR multi-gas analyzer,

MKS Instruments model 2030. MKS digital mass flow controllers were used to achieve the desired concentrations and relative humidity (cf. SI Figures S1). For high concentrations of formaldehyde (i.e., 15 and 20 ppm), gas streams were produced by flushing dry nitrogen through a Teflon tube containing paraformaldehyde fine powder, and mixing with dry and wet nitrogen gas. Again concentrations were confirmed by in-line FTIR analysis.

For all sensing experiments, the arrays were imaged on an ordinary flatbed scanner (Epson Perfection V200); the before-exposure image was acquired after 2 min. flow of 50% RH N<sub>2</sub> flow at 500 sccm. After-exposure images were acquired every minute again at 500 sccm. Difference maps were obtained by taking the difference of the red, green, and blue (RGB) values from the center of every colorant spot (~300 pixels) from the “before” and “after” images; all difference maps shown here are averages of multiple trials. Digitization of the color differences can be performed using Adobe Photoshop<sup>™</sup> or with a customized software package, ChemEye<sup>™</sup> (ChemSensing, Inc., Champaign, IL).

The chemometric analysis was carried out on the color difference vectors (provided as a database in Supporting Information, Table S3) using the Multi-Variant Statistical Package<sup>™</sup> (MVSP v.3.1, Kovach Computing); in all cases, minimum variance (i.e., “Ward’s Method”) was used for the HCA clustering.

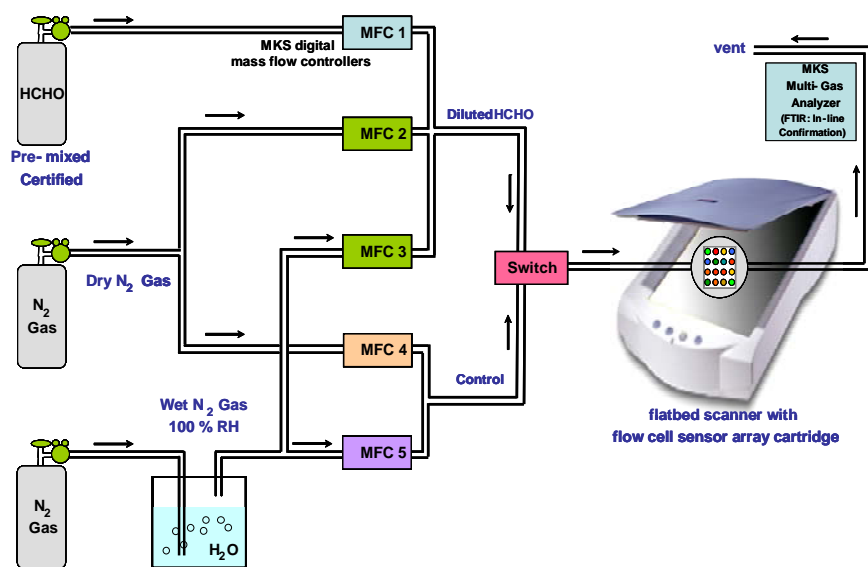

**Figure S1.** Gas mixing rig used for exposure of colorimetric sensor arrays. The box labeled “switch” is actually a series of three three-way valves, which allows for venting and also diversion of analyte stream to the MKS multi-gas analyzer. MFC = mass flow controller.

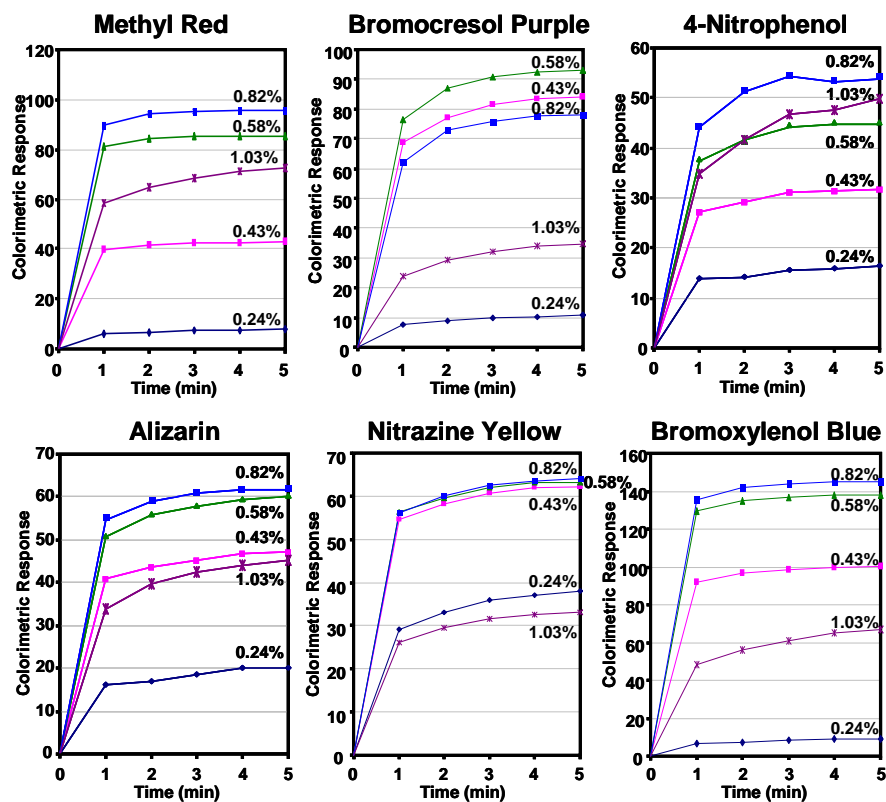

**Figure S2.** Colorimetric response (i.e.,  $(\Delta_R^2 + \Delta_G^2 + \Delta_B^2)^{1/2}$ ) of each pH indicator versus response time at various polymeric amine wt. % after exposure 20 ppm formaldehyde, at 500 sccm, 50% relative humidity and 298 K.

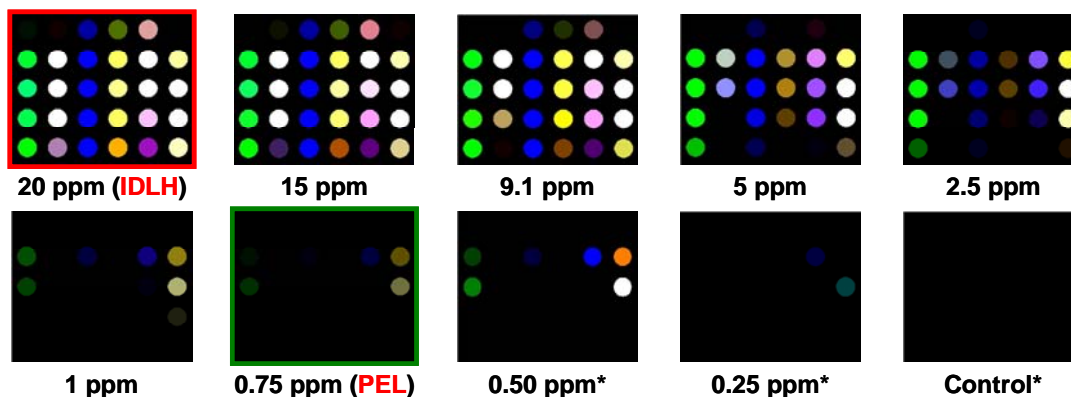

**Figure S3.** Color difference maps of formaldehyde at nine different concentrations after 1 minute exposure at 500 sccm, 50% relative humidity and 298 K. A full digital database is provided in the Supporting Information Table S3. For display purposes, the color range of these difference maps are expanded from 4 to 8 bits per color (RGB range of 4-19 expanded to 0-255), except for control and several weak responses that are marked with asterisk (RGB range of 2-5 expanded to 0-255).

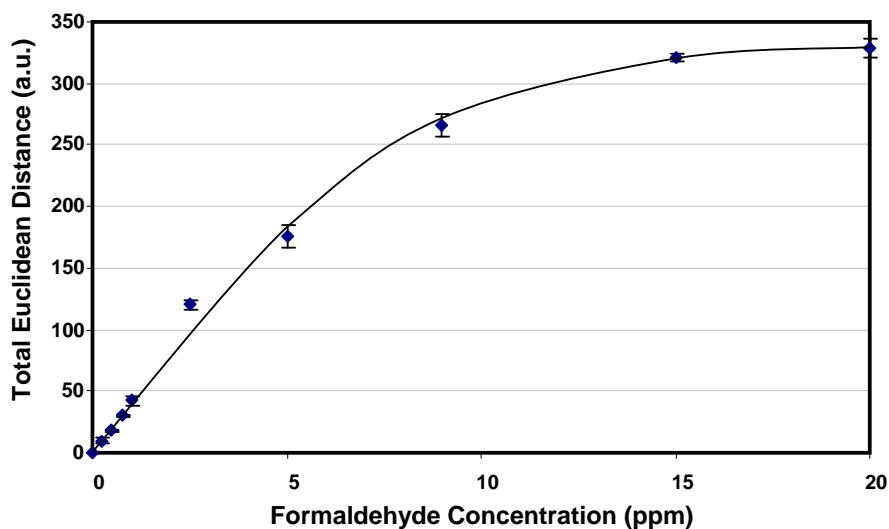

**Figure S4.** The total Euclidean distance of the color change of the array versus formaldehyde concentration. A 90-dimensional vector is defined from the changes (after 1 min. exposure minus before exposure) in the red, green and blue values of the thirty spots in our 6x5 array. The Euclidean distance is simply the total length of this 90-dimensional color-difference vector.

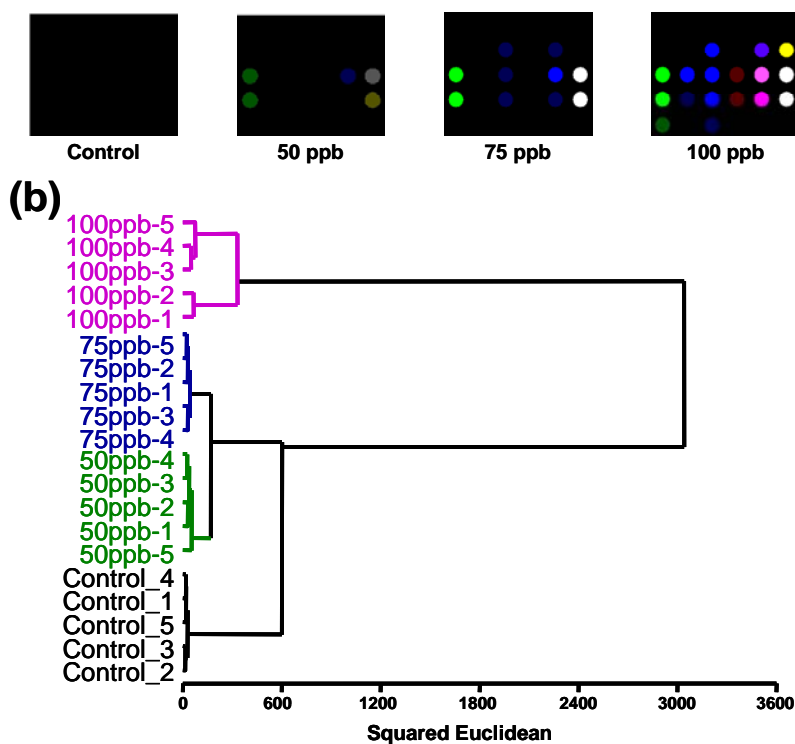

**Figure S5.** (a) Color difference maps of formaldehyde at 100 ppb, 75 ppb, 50 ppb, and a control after 10 minutes of exposure at 500 sccm, 50% relative humidity and 298 K. For display purposes, the color range of these difference maps are expanded from 2 to 8 bits per color (RGB range of 1-3 expanded to 0-255). (b) Hierarchical cluster analysis (HCA) for formaldehyde at 100 ppb, 75 ppb, and 25 ppb concentrations and a control. All experiments were run in quintuplicate trials; no confusions or errors in classification were observed in 20 trials, as shown.

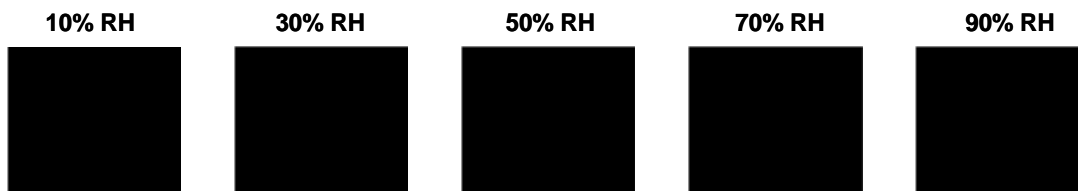

**Figure S6.** The response of array to variations in humidity from 10% to 90% RH; average of three trials is shown. For display purposes, the color range of these difference maps is expanded from 4 to 8 bits per color (RGB range of 4-19 expanded to 0-255).

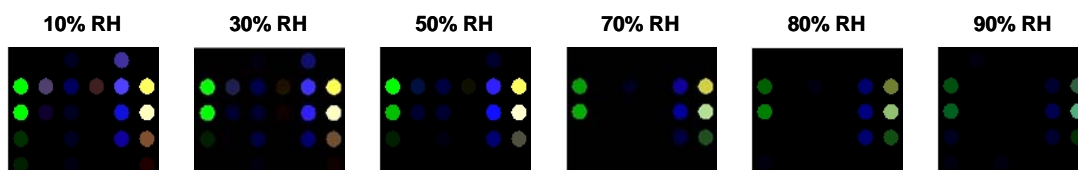

**Figure S7.** Difference maps of the colorimetric sensor array for formaldehyde at 1.5 ppm at different relative humidities at room temperature, after one minute exposure time, 500 sccm. For display purposes, the color range of these difference maps are expanded from 4 to 8 bits per color (RGB range of 4-19 expanded to 0-255).

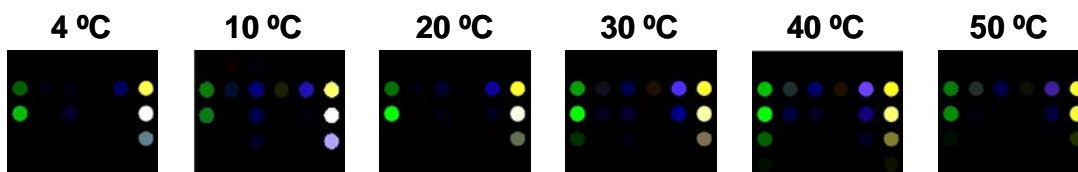

**Figure S8.** Difference maps of the colorimetric sensor array for formaldehyde at 1.5 ppm concentration at 50% RH and different temperatures, after one minute exposure time, 500 sccm. For display purposes, the color range of these difference maps are expanded from 4 to 8 bits per color (RGB range of 4-19 expanded to 0-255).

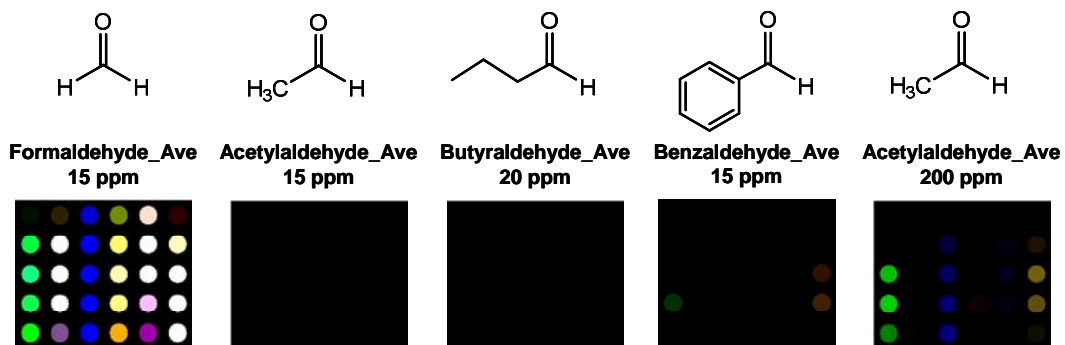

**Figure S9.** Difference maps of the colorimetric sensor array for several aldehydes at room temperatures and 50% RH, after one minute exposure time, 500 sccm. For display purposes, the color range of these difference maps are expanded from 4 to 8 bits per color (RGB range of 4-19 expanded to 0-255).

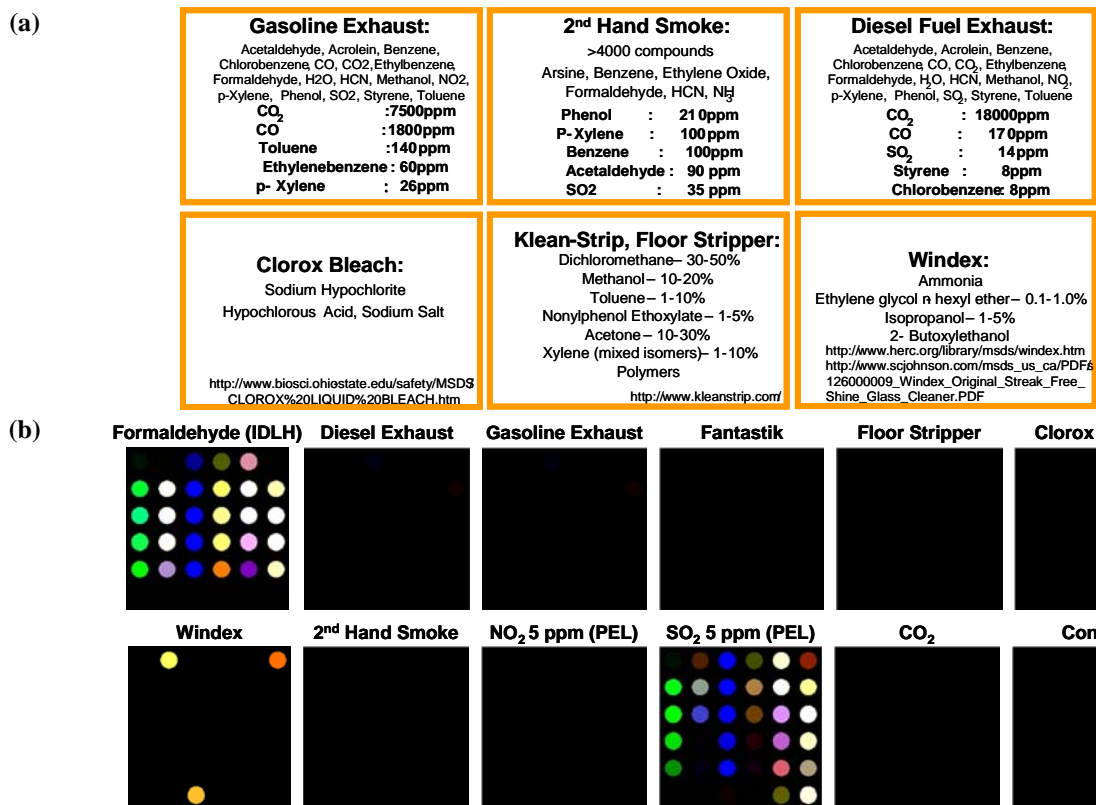

**Figure S10.** (a) The compositions for several vapor phase interferents. (b) Difference maps of the colorimetric sensor array for 10 interferents after one minute exposure at 500 sccm. For display purposes, the color range of these difference maps are expanded from 4 to 8 bits per color (RGB range of 4-19 expanded to 0-255). Interferents tested: second-hand smoke, diesel fuel exhaust, gasoline exhaust, floor stripper, Windex<sup>®</sup>, Fantastik<sup>®</sup>, and Clorox<sup>®</sup> bleach at 2% of their saturation vapor concentrations; sulfur dioxide and nitrogen dioxide at their respective PEL concentrations; and the carbon dioxide concentration at ~375 ppm (i.e., approximately ambient atmospheric concentration).

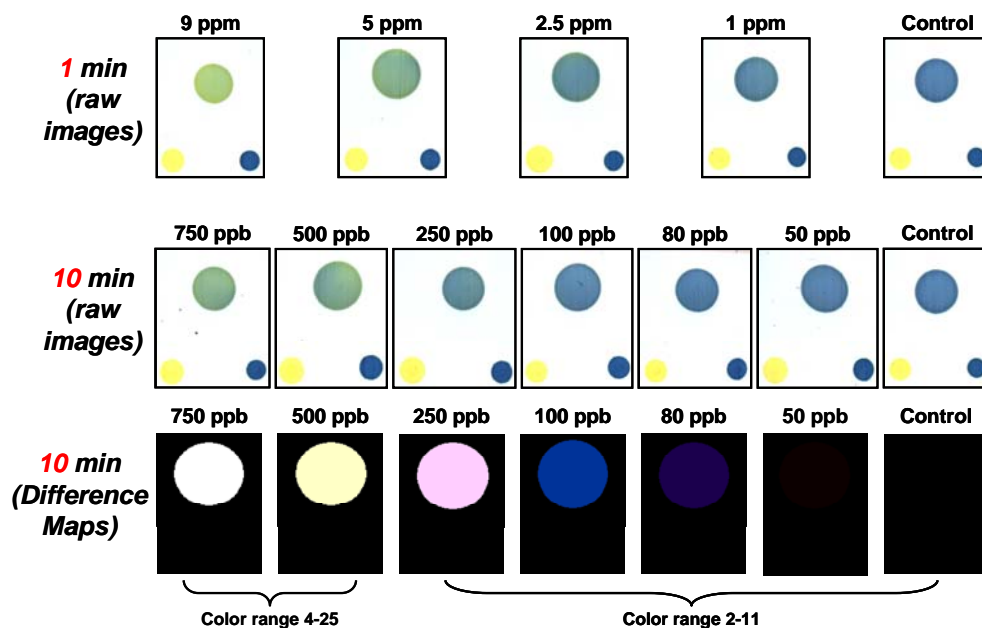

**Figure S11.** A simplified formaldehyde sensor showing the response after 1 minutes exposure (1~9 ppm) or 10 minutes exposure (50~750 ppb). The top spot is used for detection of formaldehyde and consists of bromoxylenol blue in a 0.6 wt.% amine-PEG film; the bottom two spots (left and right) are indicators for acidic and basic interferents vapors (respectively) and consist of bromoxylenol blue (lower left spot) and tetrabutylammonium hydroxide treated nitrazine yellow (lower right spot) in a non-amine PEG film.

**Table S1.** List of indicators and formulations.

| Spot # | Name                                 |
|--------|--------------------------------------|
| 1      | Methyl Red + Formulation I           |
| 2      | Bromocresol Purple + Formulation I   |
| 3      | 4-Nitrophenol + Formulation I        |
| 4      | Alizarin + Formulation I             |
| 5      | Nitrazine Yellow + Formulation I     |
| 6      | Bromoxyleneol Blue + Formulation I   |
| 7      | Methyl Red + Formulation II          |
| 8      | Bromocresol Purple + Formulation II  |
| 9      | 4-Nitrophenol + Formulation II       |
| 10     | Alizarin + Formulation II            |
| 11     | Nitrazine Yellow + Formulation II    |
| 12     | Bromoxyleneol Blue + Formulation II  |
| 13     | Methyl Red + Formulation III         |
| 14     | Bromocresol Purple + Formulation III |
| 15     | 4-Nitrophenol + Formulation III      |
| 16     | Alizarin + Formulation III           |
| 17     | Nitrazine Yellow + Formulation III   |
| 18     | Bromoxyleneol Blue + Formulation III |
| 19     | Methyl Red + Formulation IV          |
| 20     | Bromocresol Purple + Formulation IV  |
| 21     | 4-Nitrophenol + Formulation IV       |
| 22     | Alizarin + Formulation IV            |
| 23     | Nitrazine Yellow + Formulation IV    |
| 24     | Bromoxyleneol Blue + Formulation IV  |
| 25     | Methyl Red + Formulation V           |
| 26     | Bromocresol Purple + Formulation V   |
| 27     | 4-Nitrophenol + Formulation V        |
| 28     | Alizarin + Formulation V             |
| 29     | Nitrazine Yellow + Formulation V     |
| 30     | Bromoxyleneol Blue + Formulation V   |

Spot numbering from left to right, top to bottom for 6x5 array shown in Figure 1.

TBAH: 1.0 M tetrabutylammonium hydroxide in 2-methoxyethanol; amino-PEG: poly(ethylene glycol) bis(3-aminopropyl)terminated

Formulation I: amino-PEG (100mg) + Benzyl butyl phthalate (500mg) + PEG 400 (300mg) + 10mL 2-Methoxyethanol

Formulation II: amino-PEG (200mg) + Benzyl butyl phthalate (500mg) + PEG 400 (300mg) + 10mL 2-Methoxyethanol

Formulation III: amino-PEG (300mg) + Benzyl butyl phthalate (500mg) + PEG 400 (300mg) + 10mL 2-Methoxyethanol

Formulation IV: amino-PEG (500mg) + Benzyl butyl phthalate (500mg) + PEG 400 (300mg) + 10mL 2-Methoxyethanol

Formulation V: amino-PEG (750mg) + Benzyl butyl phthalate (500mg) + PEG 400 (300mg) + 10mL 2-Methoxyethanol

**Table S2.** List of indicators and formulations for interferents test.

| Spot # | Name                                     |
|--------|------------------------------------------|
| 1      | Methyl Red + Formulation I               |
| 2      | Bromocresol Purple + Formulation I       |
| 3      | 4-Nitrophenol + Formulation I            |
| 4      | Alizarin + Formulation I                 |
| 5      | Nitrazine Yellow + Formulation I         |
| 6      | Bromoxyleneol Blue + Formulation I       |
| 7      | Methyl Red + Formulation II              |
| 8      | Bromocresol Purple + Formulation II      |
| 9      | 4-Nitrophenol + Formulation II           |
| 10     | Alizarin + Formulation II                |
| 11     | Nitrazine Yellow + Formulation II        |
| 12     | Bromoxyleneol Blue + Formulation II      |
| 13     | Methyl Red + Formulation III             |
| 14     | Bromocresol Purple + Formulation III     |
| 15     | 4-Nitrophenol + Formulation III          |
| 16     | Alizarin + Formulation III               |
| 17     | Nitrazine Yellow + Formulation III       |
| 18     | Bromoxyleneol Blue + Formulation III     |
| 19     | Methyl Red + Formulation IV              |
| 20     | Bromocresol Purple + Formulation IV      |
| 21     | 4-Nitrophenol + Formulation IV           |
| 22     | Alizarin + Formulation IV                |
| 23     | Nitrazine Yellow + Formulation IV        |
| 24     | Bromoxyleneol Blue + Formulation IV      |
| 25     | Methyl Red + Formulation V               |
| 26     | Bromocresol Purple + Formulation V       |
| 27     | 4-Nitrophenol + Formulation V            |
| 28     | Alizarin + Formulation V                 |
| 29     | Nitrazine Yellow + Formulation V         |
| 30     | Bromoxyleneol Blue + Formulation V       |
| 31     | Methyl Red + Formulation VI              |
| 32     | Alizarin + Formulation VI                |
| 33     | Nitrazine Yellow + Formulation VI        |
| 34     | Methyl Red + TBAH + Formulation VI       |
| 35     | Alizarin + TBAH + Formulation VI         |
| 36     | Nitrazine Yellow + TBAH + Formulation VI |

Spot numbering from left to right, top to bottom for 6x6 array shown in Figure 1.

The first 30 spots are identical with Table S1.

TBAH: 1.0 M tetrabutylammonium hydroxide in 2-methoxyethanol; amino-PEG: poly(ethylene glycol) bis(3-aminopropyl)terminated

Formulation I: amino-PEG (100mg) + Benzyl butyl phthalate (500mg) + PEG 400 (300mg) + 10mL 2-Methoxyethanol

Formulation II: amino-PEG (200mg) + Benzyl butyl phthalate (500mg) + PEG 400 (300mg) + 10mL 2-Methoxyethanol

Formulation III: amino-PEG (300mg) + Benzyl butyl phthalate (500mg) + PEG 400 (300mg) + 10mL 2-Methoxyethanol

Formulation IV: amino-PEG (500mg) + Benzyl butyl phthalate (500mg) + PEG 400 (300mg) + 10mL 2-Methoxyethanol

Formulation V: amino-PEG (750mg) + Benzyl butyl phthalate (500mg) + PEG 400 (300mg) + 10mL 2-Methoxyethanol

Formulation VI: PEG 1500 (300mg) + Benzyl butyl phthalate (500mg) + PEG 400 (300mg) + 10mL 2-Methoxyethanol









|           | R28       | G28       | B28       | R29       | G29       | B29       | R30       | G30       | B30       |
|-----------|-----------|-----------|-----------|-----------|-----------|-----------|-----------|-----------|-----------|
| 20ppm_1   | 18.36232  | 11.22319  | -5.472458 | 14.28406  | 5.18261   | -18.71594 | 21.71884  | 20.28406  | -17.87247 |
| 20ppm_2   | 22.12391  | 15.68333  | -1.595652 | 13.72391  | 4.923189  | -15.72609 | 30.52464  | 27.67681  | -16.22609 |
| 20ppm_3   | 21.91305  | 15.09855  | -0.971016 | 13.75652  | 4.231884  | -17.45217 | 34.67536  | 32.07826  | -16.93044 |
| 20ppm_4   | 22.09275  | 15.67536  | -1.536232 | 12.9942   | 5.249275  | -13.7971  | 34.70435  | 30.0058   | -17.4     |
| 20ppm_5   | 26.76811  | 20.86087  | -1.057968 | 17.7971   | 6.495655  | -18.0145  | 33.70435  | 30.72463  | -15.68695 |
| 15ppm_1   | 16.23478  | 9.255074  | -2.156525 | 10.91014  | 3.837681  | -14.02898 | 18.49565  | 17.48116  | -14.73624 |
| 15ppm_2   | 18.56812  | 11.89565  | -0.437683 | 11.68696  | 4.463768  | -11.3913  | 19.95652  | 18.60001  | -10.66666 |
| 15ppm_3   | 15.27536  | 8.788406  | -0.953621 | 10.51014  | 3.510143  | -12.51014 | 18.85218  | 16.96522  | -11.34782 |
| 15ppm_4   | 14.85507  | 9.028984  | -2.918839 | 10.64638  | 3.388405  | -12.28406 | 18.89855  | 16.75072  | -13.49855 |
| 15ppm_5   | 15.02029  | 8.91304   | -2.226089 | 10.57392  | 3.371014  | -14.38261 | 17.96812  | 16.22029  | -15.00579 |
| 9ppm_1    | 12.15942  | 7.391304  | 3.249275  | 9.942028  | 4.313042  | -12.3913  | 18.1913   | 19.24638  | -8.553619 |
| 9ppm_2    | 10.25797  | 8.379715  | 1.655075  | 8.507248  | 3.417389  | -11.06957 | 15.42899  | 15.86957  | -9.666672 |
| 9ppm_3    | 14.82609  | 10.6087   | 3.681152  | 9.171015  | 3.449276  | -10.96522 | 26.9855   | 26.51304  | -14.86377 |
| 9ppm_4    | 11.08985  | 7.843483  | 3.765213  | 10.14493  | 4.301449  | -11.21159 | 15.96522  | 16.25217  | -8.544922 |
| 9ppm_5    | 11.77971  | 7.599998  | 2.828987  | 9.753622  | 4.344925  | -12.02898 | 14.15942  | 14.36232  | -7.382607 |
| 5ppm_1    | 4.373917  | 3.028992  | 2.985504  | 2.857971  | 1.431885  | -6.240578 | 8.426088  | 8.136234  | -6.608696 |
| 5ppm_2    | 3.078262  | 1.562317  | 1.289856  | 2.205797  | 1.185509  | -3.81739  | 5.434782  | 4.107243  | -5.472458 |
| 5ppm_3    | 4.930435  | 3.344933  | 1.965218  | 4.994204  | 2.286957  | -7.014496 | 17.04348  | 16.88696  | -8.626083 |
| 5ppm_4    | 5.214493  | 3.44928   | 3.04348   | 3.57971   | 1.428986  | -5.588409 | 12.54493  | 12.06377  | -7.362328 |
| 5ppm_5    | 3.973915  | 1.968109  | 1.014496  | 2.826086  | 1.489853  | -4.866669 | 6.88406   | 6.272465  | -7.162315 |
| 2.5ppm_1  | 1.081161  | 0.698547  | 1.626091  | 1.834784  | 0.527538  | -1.881165 | 6.611595  | 6.489853  | -4.933334 |
| 2.5ppm_2  | 2.460869  | 1.347824  | 2.597099  | 4.098549  | 2.663769  | 0.165222  | 7.037682  | 5.652176  | -4.982613 |
| 2.5ppm_3  | 2.727539  | 2.469566  | 2.617393  | 1.750725  | 0.886959  | -2.098549 | 6.165218  | 5.460869  | -4.150726 |
| 2.5ppm_4  | 3.121742  | 1.704346  | 2.113045  | 1.968117  | 0.756523  | -3.643478 | 9.686958  | 9.113037  | -5.843475 |
| 2.5ppm_5  | 2.554591  | 1.44058   | 2.307246  | 1.548793  | 0.622223  | -2.254107 | 6.176812  | 5.69082   | -3.690821 |
| 1ppm_1    | 0.09565   | 0.231888  | 1.359421  | 0.031883  | -0.130432 | -0.228981 | 1.284058  | 1.510147  | -1.365211 |
| 1ppm_2    | 0.072464  | 0.426086  | 0.611595  | 0.200001  | -0.069565 | -1.202896 | 1.504345  | 0.759422  | -2.107246 |
| 1ppm_3    | 0.228989  | 0.495651  | 0.289856  | 0.733334  | 0.414494  | -0.289856 | 3.144928  | 2.727539  | -2.481155 |
| 1ppm_4    | -0.052177 | 0.892754  | 0.437683  | 0.252172  | 0.25507   | -0.118835 | 1.82029   | 2.344925  | -1.391304 |
| 1ppm_5    | 0.234787  | -0.4058   | 0.402901  | 0.060869  | -0.434784 | -1.156517 | 1.324638  | 1.565216  | -2.217392 |
| 0.75ppm_1 | -0.257973 | -0.678261 | -0.292755 | -0.095654 | -0.466663 | 0.617393  | 0.321739  | 0.191307  | -1.220284 |
| 0.75ppm_2 | 0.031891  | -0.41449  | 0.324638  | 0.672462  | 0.171013  | -0.159424 | 0.779711  | 0.365219  | -1.492752 |
| 0.75ppm_3 | -0.118835 | -0.052177 | 0.020287  | 0.33913   | 0.110146  | -0.211594 | 0.672462  | 0.90435   | -1.284058 |
| 0.75ppm_4 | 0.026085  | -0.515938 | -0.376816 | 0.408695  | -0.344925 | -1.344925 | 1.330433  | 1.078262  | -1.976814 |
| 0.75ppm_5 | 0.747826  | 0.142029  | 1.234787  | 0.623188  | -0.130436 | -1.368118 | 1.463768  | 0.486954  | -1.895653 |
| 0.5ppm_1  | -0.652168 | 0.110146  | 0.284058  | 0.191303  | 0.626087  | -0.066666 | 0.547829  | 0.5942    | -0.936226 |
| 0.5ppm_2  | 0.301453  | -0.515938 | -0.220291 | 0.24058   | -0.507244 | -0.50145  | -0.02319  | -0.13913  | -1.22319  |
| 0.5ppm_3  | -0.127533 | -0.211594 | 0.4058    | 0.472464  | -0.492752 | -1.342033 | 0.597099  | 0.449276  | -0.075363 |
| 0.5ppm_4  | -0.599998 | -0.77681  | 0.034782  | -0.031883 | -0.45507  | -1.055077 | 0.77681   | 0.440582  | -0.855072 |
| 0.5ppm_5  | -0.576813 | -0.611595 | 0.336235  | -0.226088 | 0.084057  | -0.469559 | 1.008698  | 0.434784  | -0.168114 |
| 0.25ppm_1 | -0.020294 | -0.327538 | 0.571014  | 0.371014  | 0.162319  | 0.718842  | 0.26667   | 0.234779  | -0.037682 |
| 0.25ppm_2 | -0.446381 | -0.884056 | 0.333328  | -0.014494 | -0.130432 | -0.281158 | 0.38261   | -0.13913  | 0.086952  |
| 0.25ppm_3 | -0.695648 | -0.533333 | -0.614494 | -0.231884 | -0.70145  | -0.515945 | -1.460869 | -1.49855  | -1.805801 |
| 0.25ppm_4 | -0.339127 | 0.089859  | -0.475357 | -0.04348  | -0.284058 | -0.060867 | -0.113045 | -0.962318 | -1.295654 |
| 0.25ppm_5 | -0.475357 | 0.063774  | -0.133331 | 0.747826  | 0.49855   | -0.150719 | -0.092754 | -0.356522 | -0.915939 |
| Control_1 | 0.101448  | 0.144928  | -0.449272 | -0.12174  | 0.400002  | -0.115944 | -0.182606 | -0.498558 | -0.272461 |
| Control_2 | 0.095657  | 0.234787  | 0.710144  | 0.147827  | -0.150726 | -0.536232 | 0.092754  | 0.481163  | -0.011581 |
| Control_3 | -0.942032 | -0.081154 | -0.866661 | 0.27536   | 0.005798  | -0.107246 | -0.278263 | -0.307251 | -0.579712 |
| Control_4 | 0.197105  | 0.107246  | 0.837685  | -0.484056 | -0.072464 | 0.846375  | -0.34203  | 0.026085  | 1.171021  |
| Control_5 | -0.017387 | -0.237686 | -0.402901 | -0.037682 | 0.585506  | 0.011597  | -0.449274 | 0.18261   | 0.356522  |
